# Supplementary material
Source: PubMed Central journal article supplement (PMC7747159)
Supplement: JCB898148_Supplemental_Figure.pdf [file JCB898148_Supplemental_Figure.pdf]

## Supplementary Material

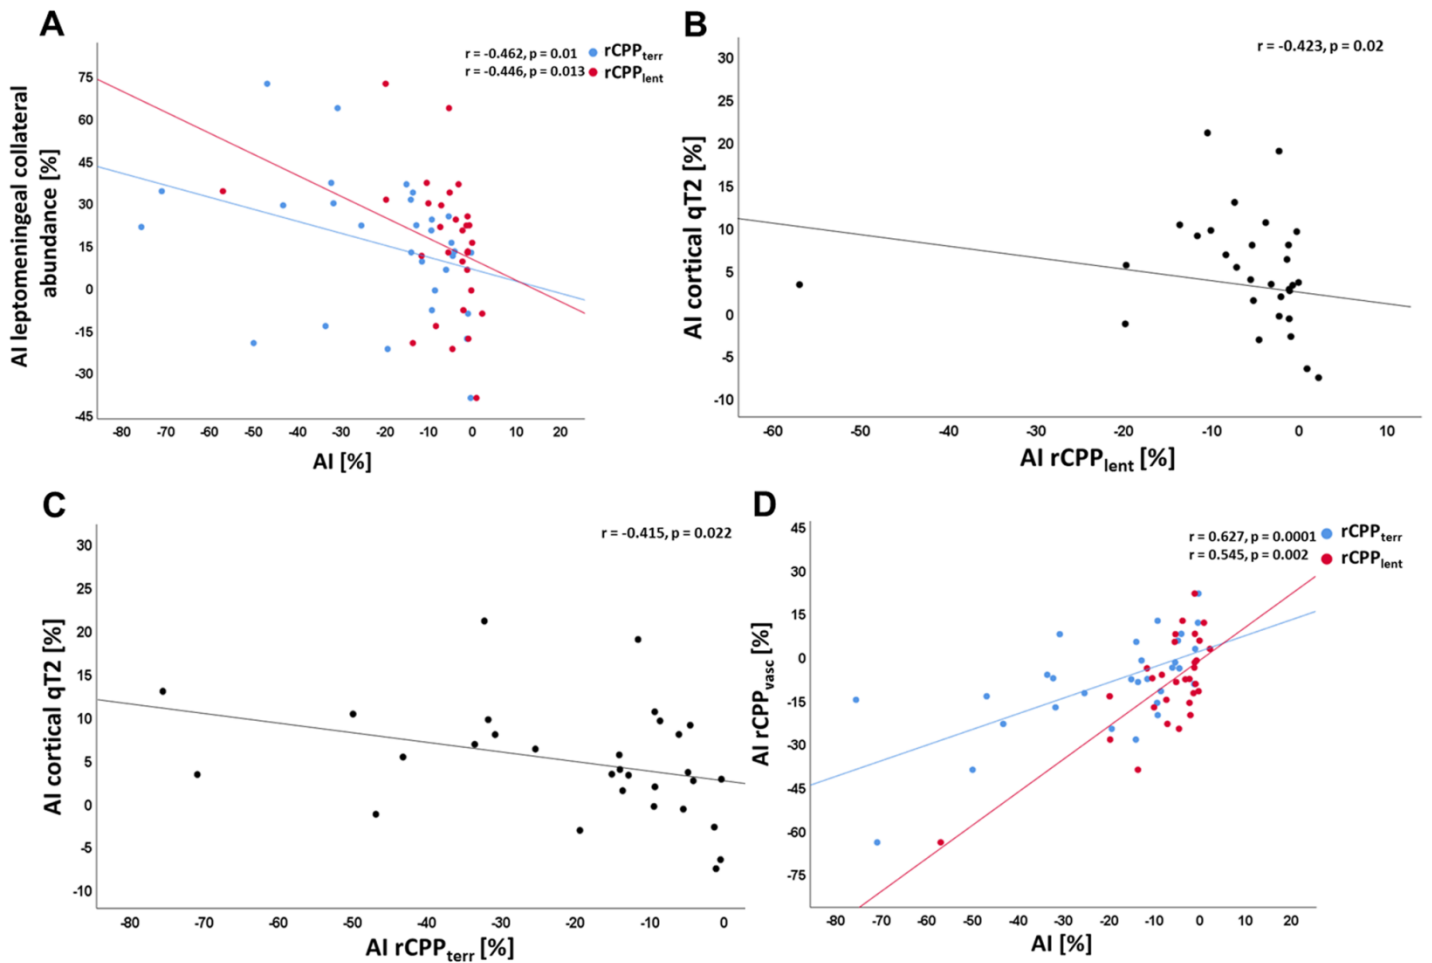

**Supplemental Figure.** Scatterplots of significant relationships between several imaging parameters. A: Relationship between relative collateral vessel abundance and changes of  $rCPP_{terr}$ , respectively  $rCPP_{lent}$ . B: Relationship between relative changes of cortical qT2 and  $rCPP_{lent}$ . C: Association between relative changes of cortical qT2 and  $rCPP_{terr}$ . D: Correlation of pial collateral intravascular perfusion pressure ( $rCPP_{vasc}$ ) with  $rCPP_{terr}$  and  $rCPP_{lent}$ . AI: asymmetry index; q: quantitative; rCPP: relative cerebral perfusion pressure.
